# Supplementary material
Source: publisher site journal article supplement (https://www.dovepress.com/article/565239)
Supplement: Supplementary file 1 [file Supplement_HAE%20RWE%20Study.pdf]

---

**Supplement Table 1. NDC/HCPCS codes for LTP**

| <b>HAE Medication</b>                                       | <b>NDC Codes</b> | <b>HCPCS Codes</b>                                                                    |
|-------------------------------------------------------------|------------------|---------------------------------------------------------------------------------------|
| Haegarda<br>(C1 esterase inhibitor<br>subcutaneous [human]) | 63833-0828-02    | J0599 - Injection, c-1 esterase inhibitor (human),<br>(haegarda), 10 units            |
|                                                             | 63833-0829-02    | C9015 - Injection, c-1 esterase inhibitor (human),<br>haegarda, 10 units              |
| Takhzyro<br>(lanadelumab-flyo)                              | 47783-0644-01    | J0593 - Injection, lanadelumab-flyo, 1 mg (code<br>may be used for Medicare when drug |
|                                                             | 47783-0646-01    | administered under direct supervision of a                                            |
|                                                             | 47783-0645-01    | physician, not for use when drug is self-<br>administered)                            |

**Supplement Table 2.** NDC codes for acute treatment

| <b>Acute Treatment</b> | <b>NDC Codes</b> |
|------------------------|------------------|
| Berinert               | 63833-0825-02    |
|                        | 63833-0835-01    |
| Firazyr                | 54092-0702-02    |
|                        | 54092-0702-03    |
| Icatibant              | 00093-3066-34    |
|                        | 00093-3066-93    |
|                        | 24201-0207-01    |
|                        | 24201-0207-03    |
|                        | 54092-0135-01    |
|                        | 54092-0135-02    |
|                        | 60505-6214-01    |
|                        | 63323-0574-86    |
|                        | 63323-0574-93    |
|                        | 69097-0664-34    |
| 69097-0664-68          |                  |
| 71225-0114-01          |                  |
| Kalbitor               | 47783-0101-01    |
| Ruconest               | 68012-0350-02    |
|                        | 68012-0350-01    |
|                        | 71274-0350-02    |
|                        | 71274-0350-01    |
| Sajazir                | 70709-0013-01    |
|                        | 70709-0013-03    |

**Supplement Table 3. ICD-10-CM diagnosis codes for comorbidities**

| Condition                               | ICD-10-CM Diagnosis Codes                                                                                                                                                                      |
|-----------------------------------------|------------------------------------------------------------------------------------------------------------------------------------------------------------------------------------------------|
| Cardiovascular disease                  | G45*, G97.3*, I60*-I66*, I67.2, I67.8*-I67.9, I69*, I97.81*-I97.82* (Excl. I67.83)<br>I05*-I09*, I11*, I13*, I20*-I25*, I27*, I34-I39*, I42*-I43, I50*, I51.0, I51.3, Q20*-Q24*, Q25.1, Q25.21 |
| Diabetes                                | E08* - E13*, Z79.4                                                                                                                                                                             |
| Immunosuppressive conditions/treatments | C00* - C96* (Excl. C44*, C88.0, C96.5, C96.6)<br>Z51.0-Z51.1*<br>Z94* (Excl. Z94.5, Z94.6, Z94.7)                                                                                              |
| Liver disease                           | I85*, K70*, K72* - K74*, K75.0-K75.1, K75.4, K75.81, K75.9, K76.0-K76.1, K76.6-K76.7, K76.89, K76.9                                                                                            |
| Metabolic disorders                     | E08* - E13*, Z79.4<br>E78*<br>I10 - I16*<br>R73.9<br>E66*, O99.21*, Z68.4*                                                                                                                     |
| Neurologic disorders                    | F01*-F09, G12*-G14, G20-G23*, G30*-G32.*, G35-G37.*, G40*, G80, I63*, I65*-I66*, I69*, Q00*, Q05.0-Q05.8                                                                                       |
| Obesity (BMI >40)                       | E66*, O99.21*, Z68.4*                                                                                                                                                                          |
| Osteoarthritis                          | M15*-M19*                                                                                                                                                                                      |
| Respiratory disease                     | E84*, I27.2*, I27.81, I27.89, I27.9, J40 - J47*, J60 - J66*, J68.4, J84*, J96.1*-J96.2*, P27                                                                                                   |

\* = wildcard (any characters)
